# Supplementary material for: Unusual thermo-mechanical properties of the Janus Mo2ScC2OH MXene monolayer
Source: Royal Society of Chemistry journal article supplement (doi:10.1039/d3cp01698f), 2023-01-01
Supplement: d3cp01698f1.pdf [file d3cp01698f1.pdf]

## Unusual Thermo-Mechanical Properties of Janus $\text{Mo}_2\text{ScC}_2\text{OH}$ MXene Monolayer

E. Bolen<sup>1</sup> and E. Deligoz<sup>2</sup>

<sup>1</sup>Opticianry Program, Department of Medical Services and Techniques, Vocational School of Health Services, Aksaray University, 68100, Aksaray Türkiye

<sup>2</sup>Department of Physics, Aksaray University, 68100, Aksaray, Türkiye

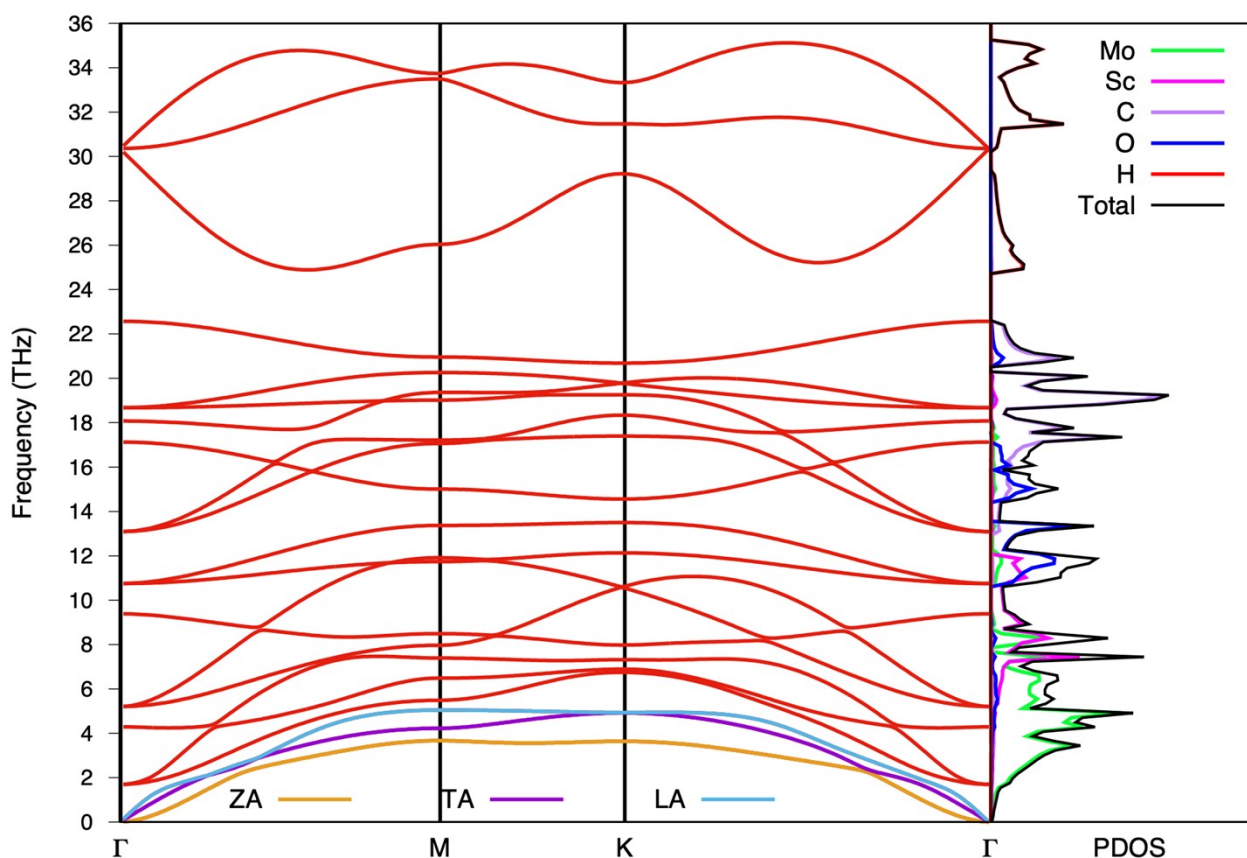

**Figure.** Phonon dispersion curve and phonon density of states obtained using the hipHive code.
